# Supplementary material for: Reactions of triosmium and triruthenium clusters with 2-ethynylpyridine: new modes for alkyne C–C bond coupling and C–H bond activation
Source: Royal Society of Chemistry journal article supplement (doi:10.1039/d0ra05393g), 2020-01-01
Supplement: d0ra05393g1.pdf [file d0ra05393g1.pdf]

## **Electronic Supplementary Information (ESI)**

**Reactions of triosmium and triruthenium clusters with 2-ethynylpyridine: new modes for alkyne C–C bond coupling and C–H bond activation**

**Md. Tuhinur R. Joy<sup>a</sup>, Roknuzzaman<sup>a</sup>, Md. Emdad Hossain <sup>a</sup>, Shishir Ghosh <sup>a,\*</sup>, Derek A. Tocher <sup>b</sup>, Michael G. Richmond <sup>c,\*</sup>, Shariff E. Kabir <sup>a,\*</sup>**

*<sup>a</sup> Department of Chemistry, Jahangirnagar University, Savar, Dhaka 1342, Bangladesh*

*<sup>b</sup>Department of Chemistry, University College London, 20 Gordon Street, London WC1H 0AJ, UK*

*<sup>c</sup>Department of Chemistry, University of North Texas, 1155 Union Circle, Box 305070, Denton, TX 76203, USA*

**Figures S1 to S16 contain IR and <sup>1</sup>H NMR spectra of the new compounds (2, 3, 5 and 6).**

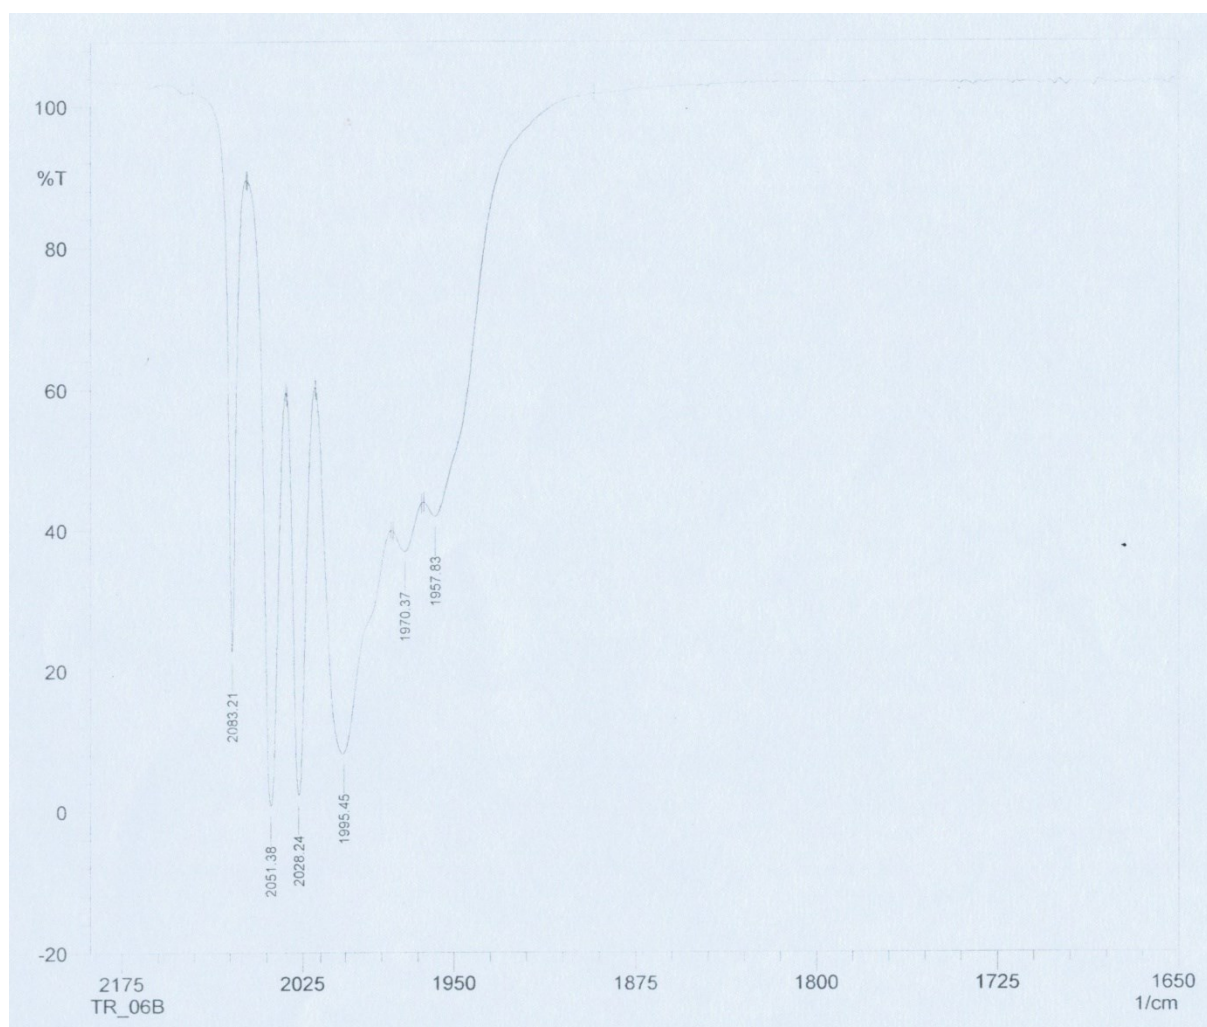

**Figure S1.** IR spectrum of  $[\text{HOs}_3(\text{CO})_9(\mu_3\text{-C}_5\text{H}_4\text{NC}=\text{CH}_2)]$  (**2**) in  $\text{CH}_2\text{Cl}_2$ .

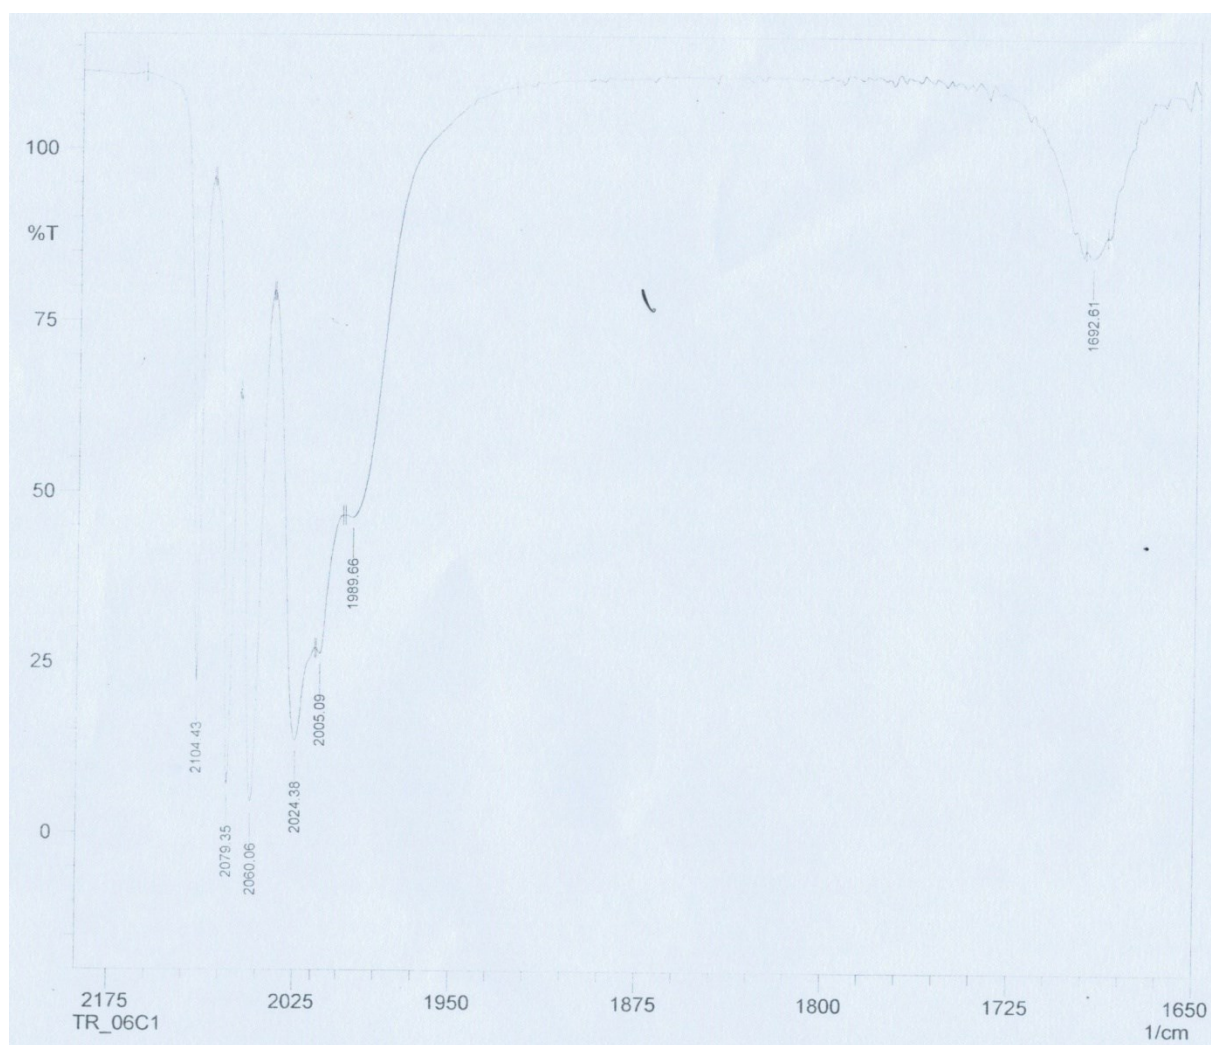

**Figure S2.** IR spectrum of  $[\text{HOs}_3(\text{CO})_9(\mu_3\text{-C}_5\text{H}_4\text{NC=CHCO}_2)]$  (**3**) in  $\text{CH}_2\text{Cl}_2$ .

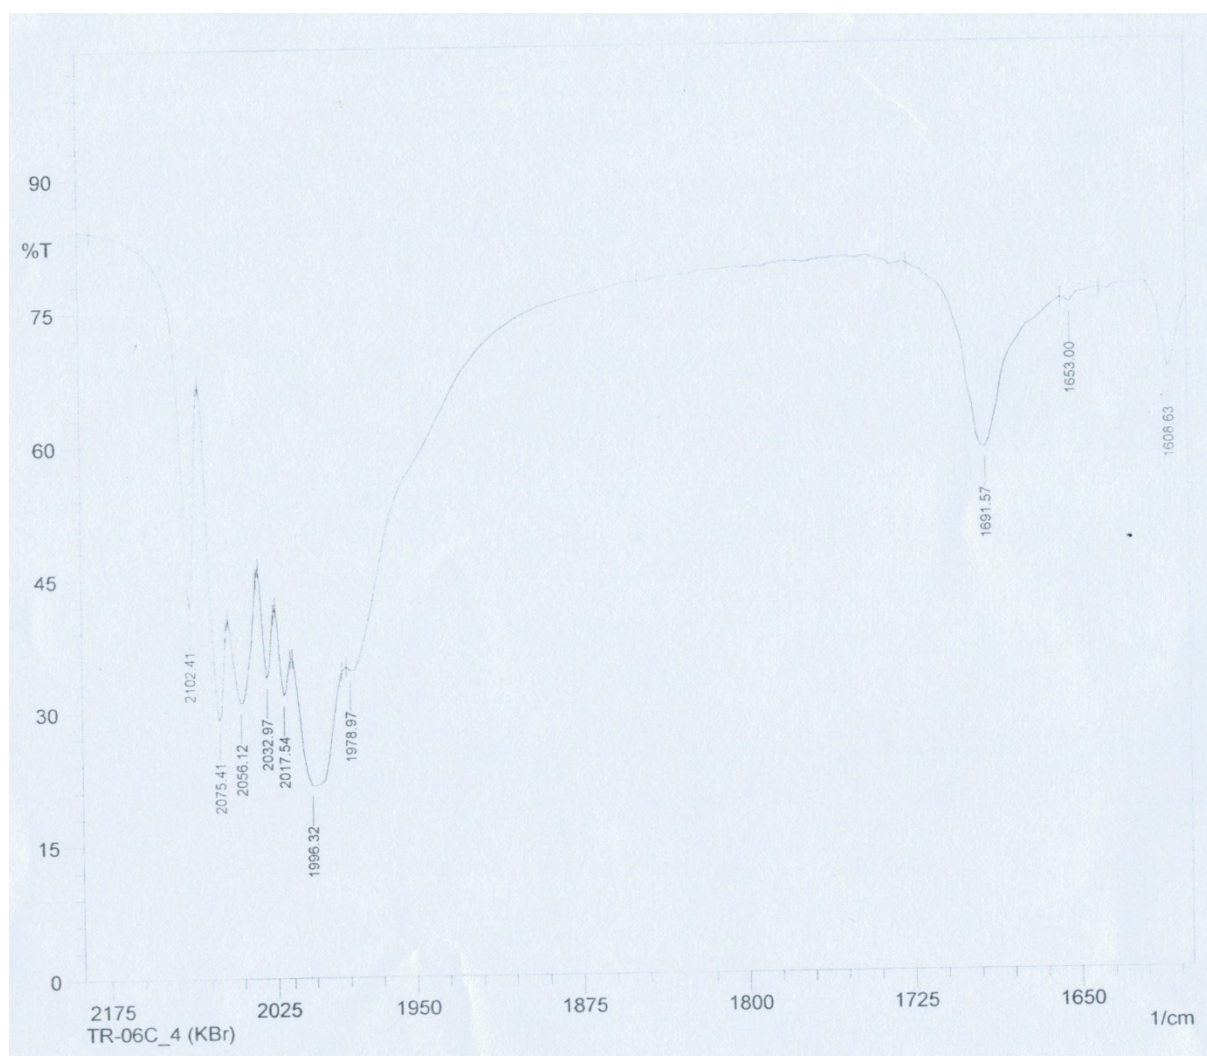

**Figure S3.** IR spectrum of  $[\text{HOs}_3(\text{CO})_9(\mu_3\text{-C}_5\text{H}_4\text{NC=CHCO}_2)]$  (**3**) in KBr.

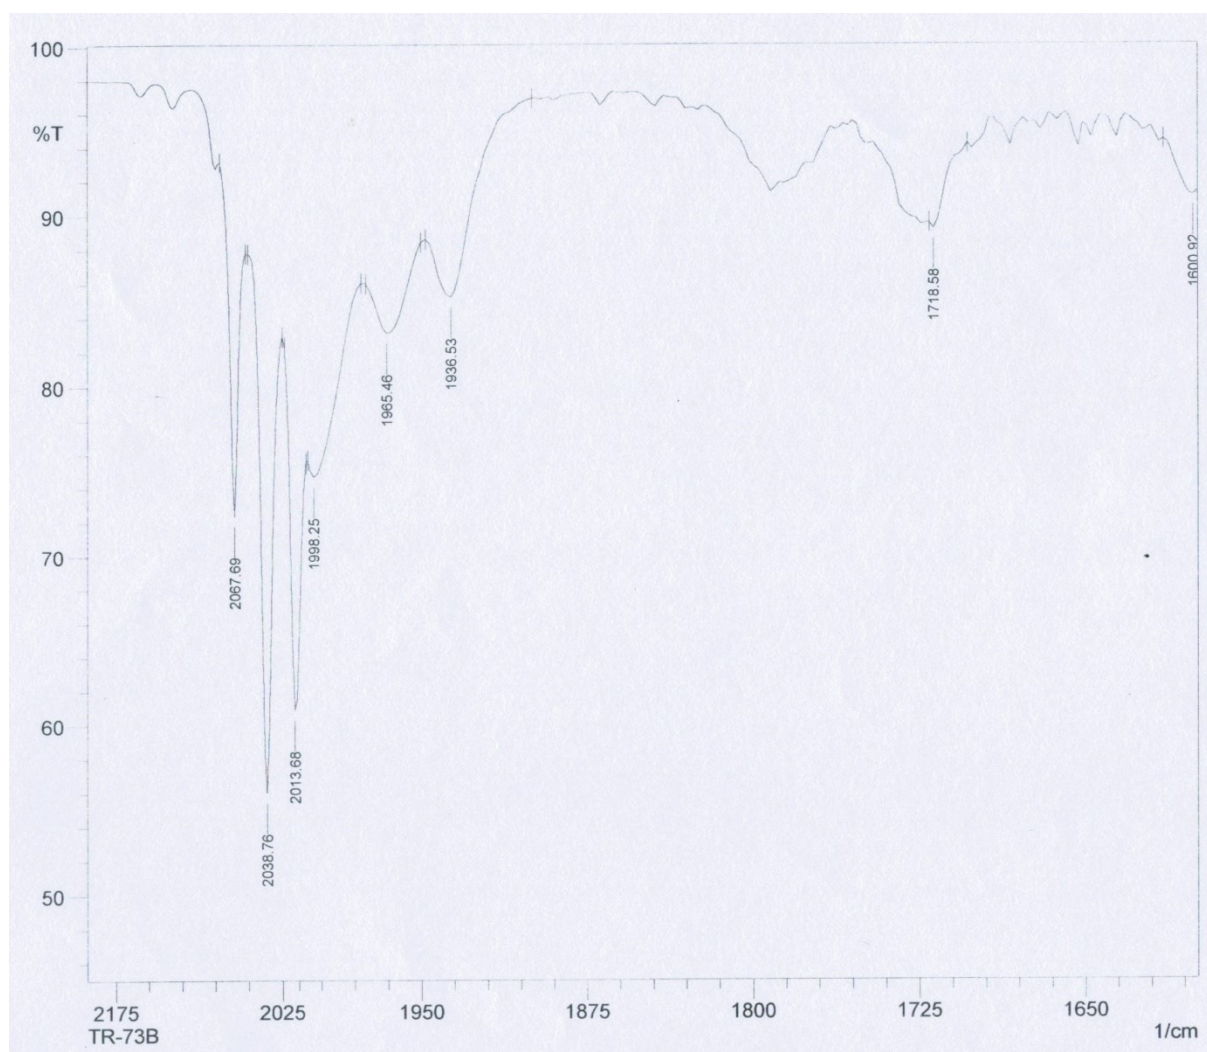

**Figure S4.** IR spectrum of  $[\text{Ru}_3(\text{CO})_7(\mu\text{-CO})\{\mu_3\text{-C}_5\text{H}_4\text{NC}=\text{CHC}(\text{C}_5\text{H}_4\text{N})=\text{CH}\}]$  (**5**) in  $\text{CH}_2\text{Cl}_2$ .

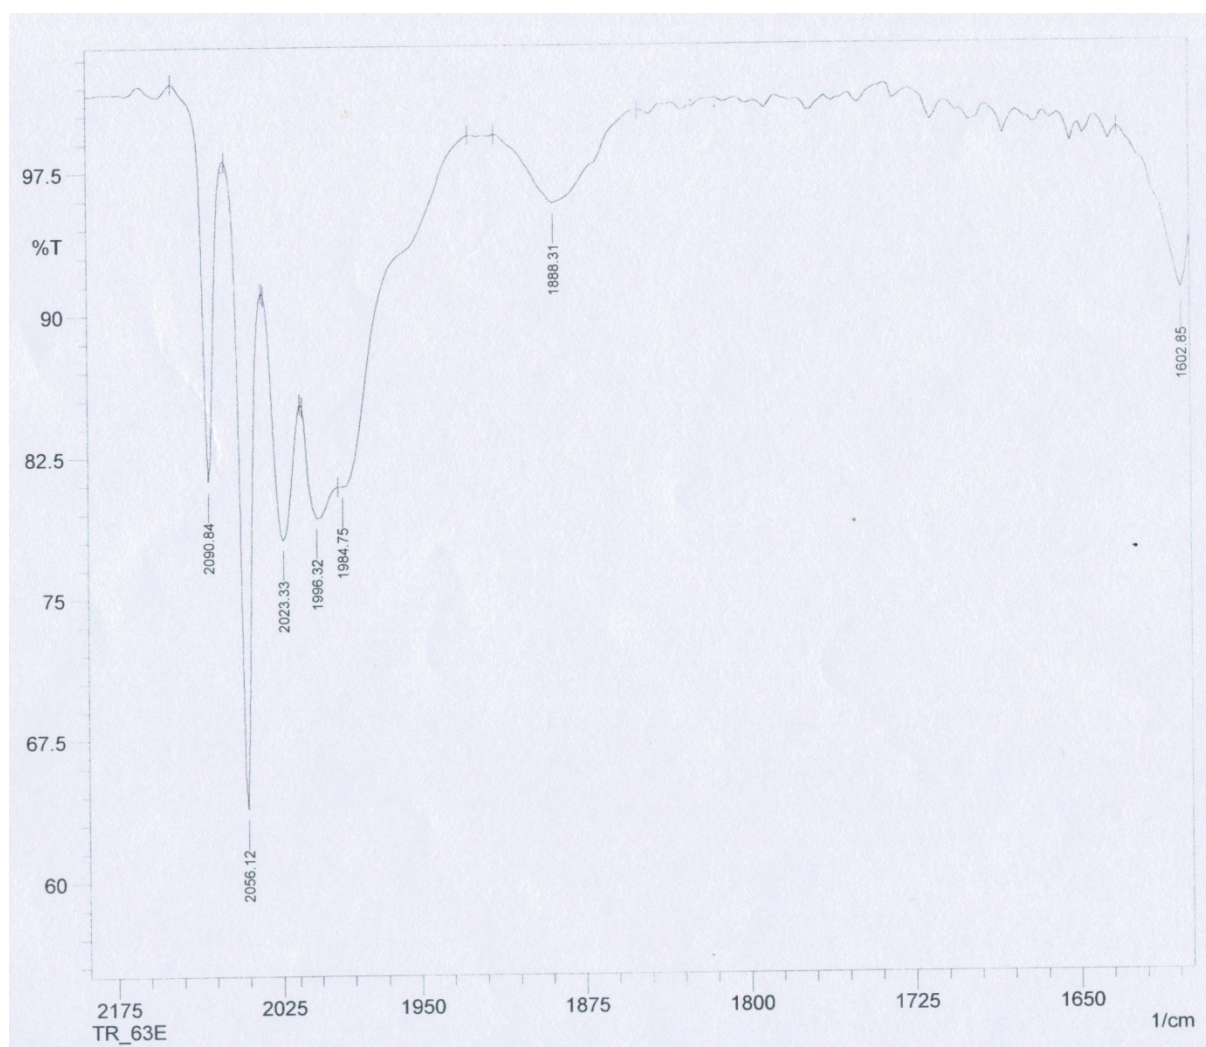

**Figure S5.** IR spectrum of  $[\text{Ru}_3(\text{CO})_7(\mu\text{-CO})\{\mu_3\text{-C}_5\text{H}_4\text{NCCHC}(\text{C}_5\text{H}_4\text{N})\text{CHCHC}(\text{C}_5\text{H}_4\text{N})\}]$  (**6**) in  $\text{CH}_2\text{Cl}_2$ .

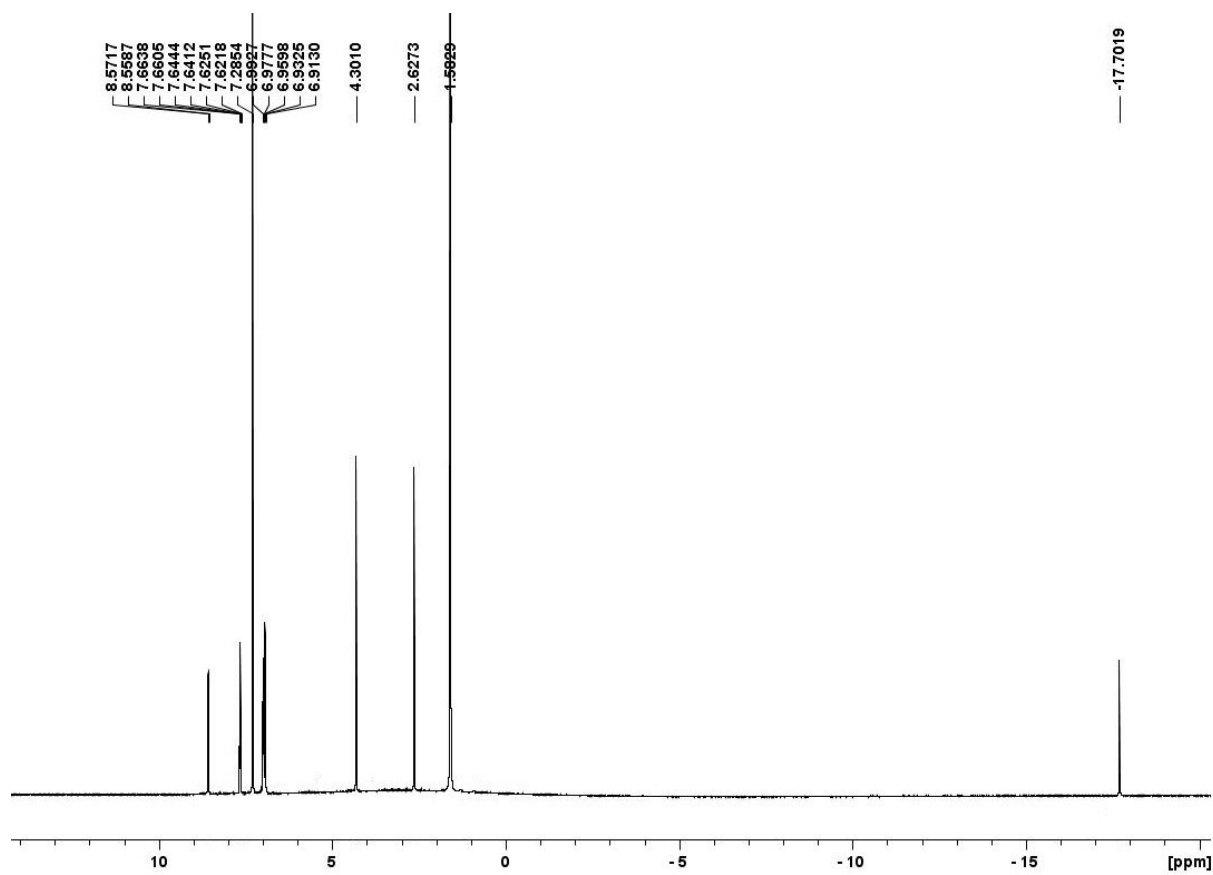

**Figure S6.**  $^1\text{H}$  NMR spectrum of  $[\text{HOs}_3(\text{CO})_9(\mu_3\text{-C}_5\text{H}_4\text{NC}=\text{CH}_2)]$  (**2**) in  $\text{CDCl}_3$  at 400 MHz. The spectrum also shows residual proton signal of  $\text{CDCl}_3$  (at  $\delta$  7.28) and  $\text{H}_2\text{O}$  (at  $\delta$  1.50).

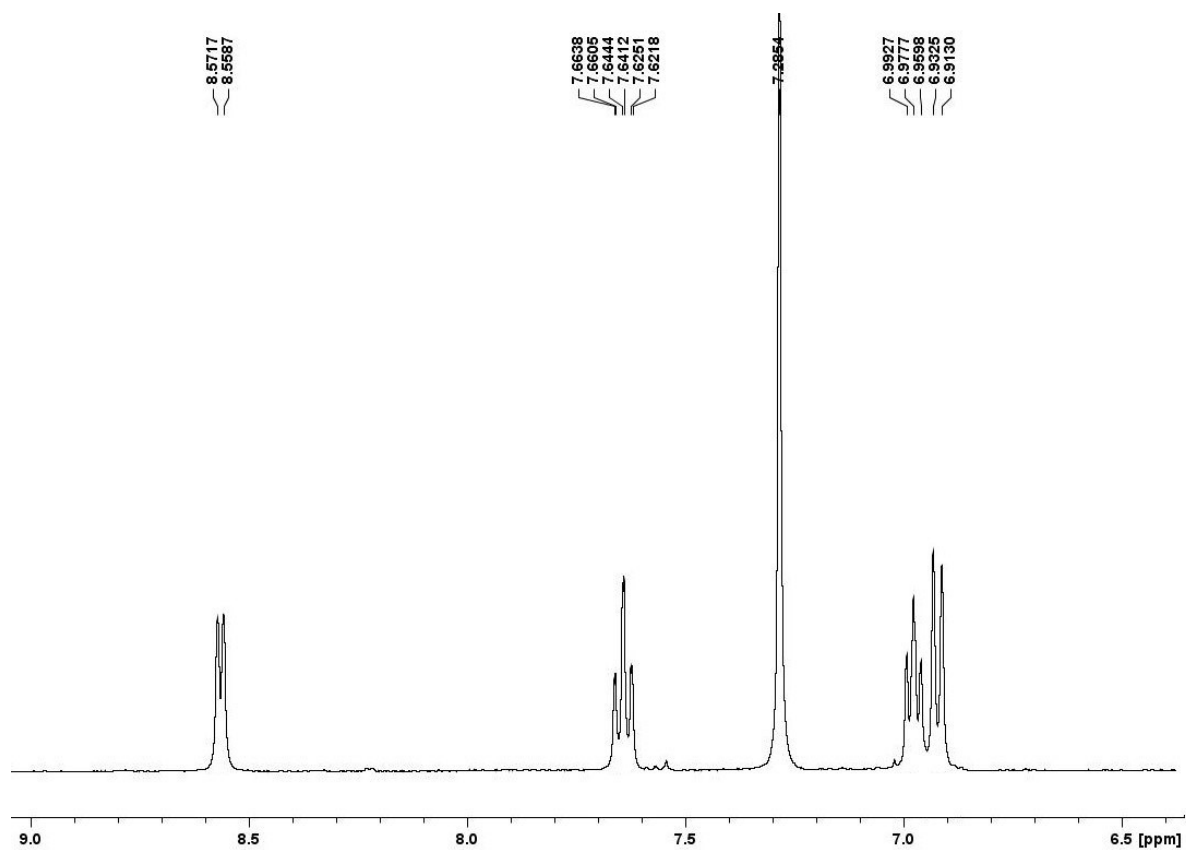

**Figure S7.** Aromatic region of the  $^1\text{H}$  NMR spectrum of  $[\text{HOs}_3(\text{CO})_9(\mu_3\text{-C}_5\text{H}_4\text{NC}=\text{CH}_2)]$  (**2**) in  $\text{CDCl}_3$  at 400 MHz. The spectrum also shows residual proton signal of  $\text{CDCl}_3$  (at  $\delta$  7.28).



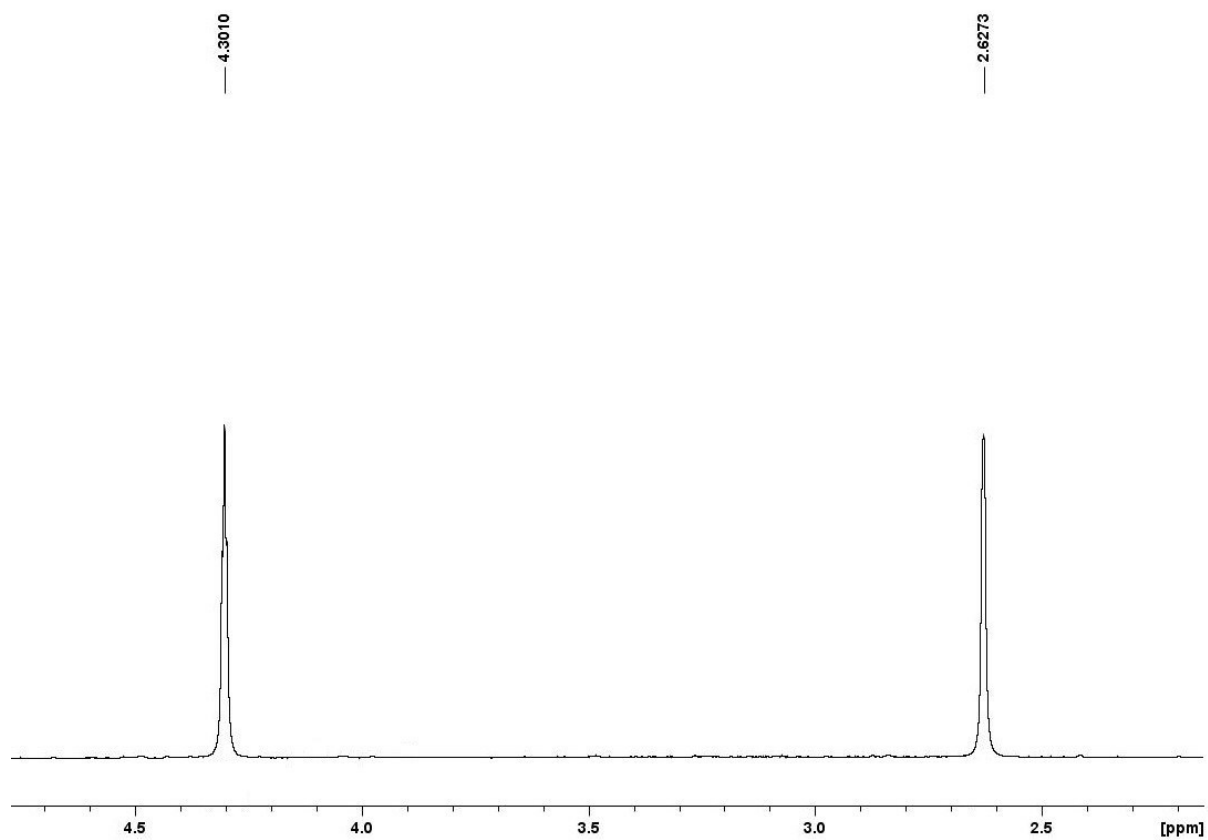

**Figure S8.** Aliphatic region of the  $^1\text{H}$  NMR spectrum of  $[\text{HOs}_3(\text{CO})_9(\mu_3\text{-C}_5\text{H}_4\text{NC}=\text{CH}_2)]$  (2) in  $\text{CDCl}_3$  at 400 MHz.

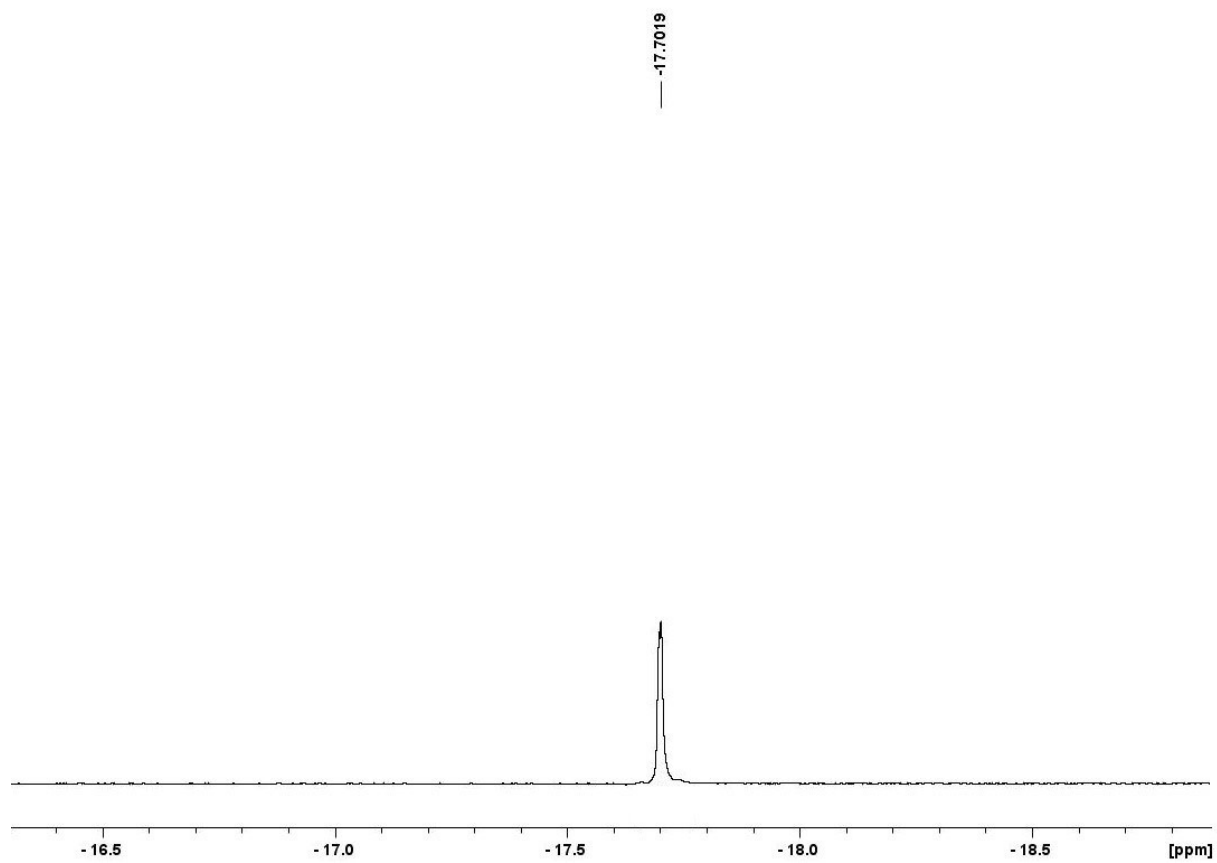

**Figure S9.** Hydride region of the  $^1\text{H}$  NMR spectrum of  $[\text{Os}_3(\text{CO})_9(\mu_3\text{-C}_5\text{H}_4\text{NC}=\text{CH}_2)]$  (**2**) in  $\text{CDCl}_3$  at 400 MHz.

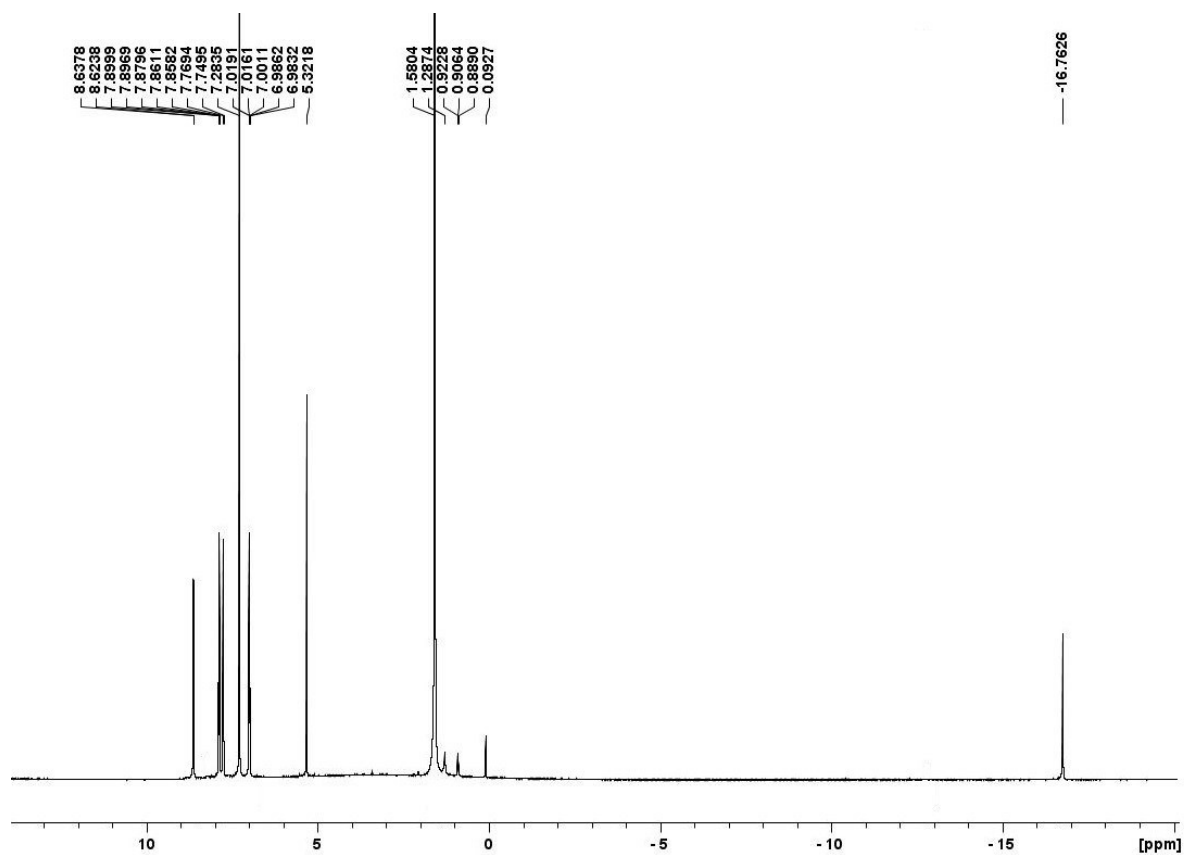

**Figure S10.**  $^1\text{H}$  NMR spectrum of  $[\text{HOs}_3(\text{CO})_9(\mu_3\text{-C}_5\text{H}_4\text{NC=CHCO}_2)]$  (**3**) in  $\text{CDCl}_3$  at 400 MHz. The spectrum also shows residual proton signal of  $\text{CDCl}_3$  (at  $\delta$  7.28) and  $\text{H}_2\text{O}$  (at  $\delta$  1.58). The compound was recrystallized from *n*-hexane/ $\text{CH}_2\text{Cl}_2$  for purification during workup whose signals are also present in the spectrum ( $\text{CH}_2\text{Cl}_2$  at  $\delta$  5.32 and *n*-hexane at  $\delta$  1.28 and 0.90).

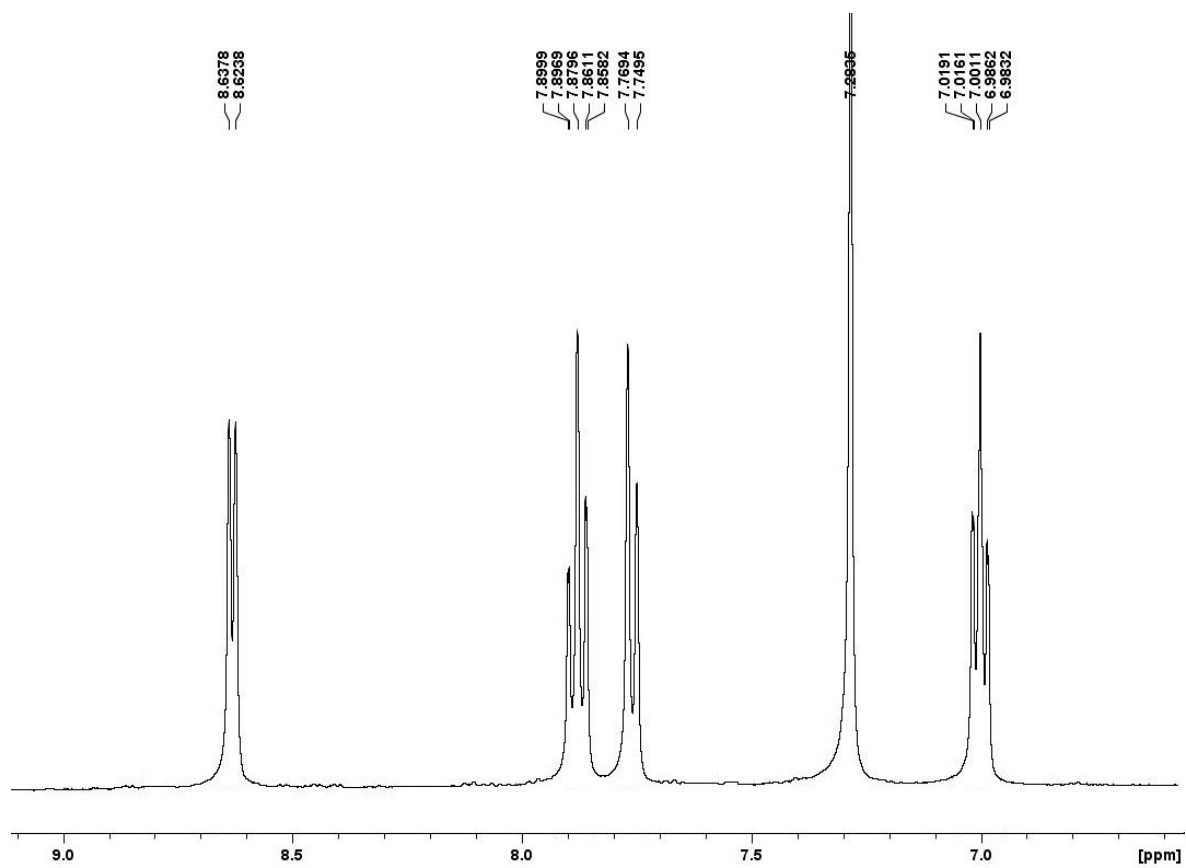

**Figure S11.** Aromatic region of the  $^1\text{H}$  NMR spectrum of  $[\text{HO}_3(\text{CO})_9(\mu_3\text{-C}_5\text{H}_4\text{NC}=\text{CHCO}_2)]$  (**3**) in  $\text{CDCl}_3$  at 400 MHz. The spectrum also shows residual proton signal of  $\text{CDCl}_3$  (at  $\delta$  7.28).

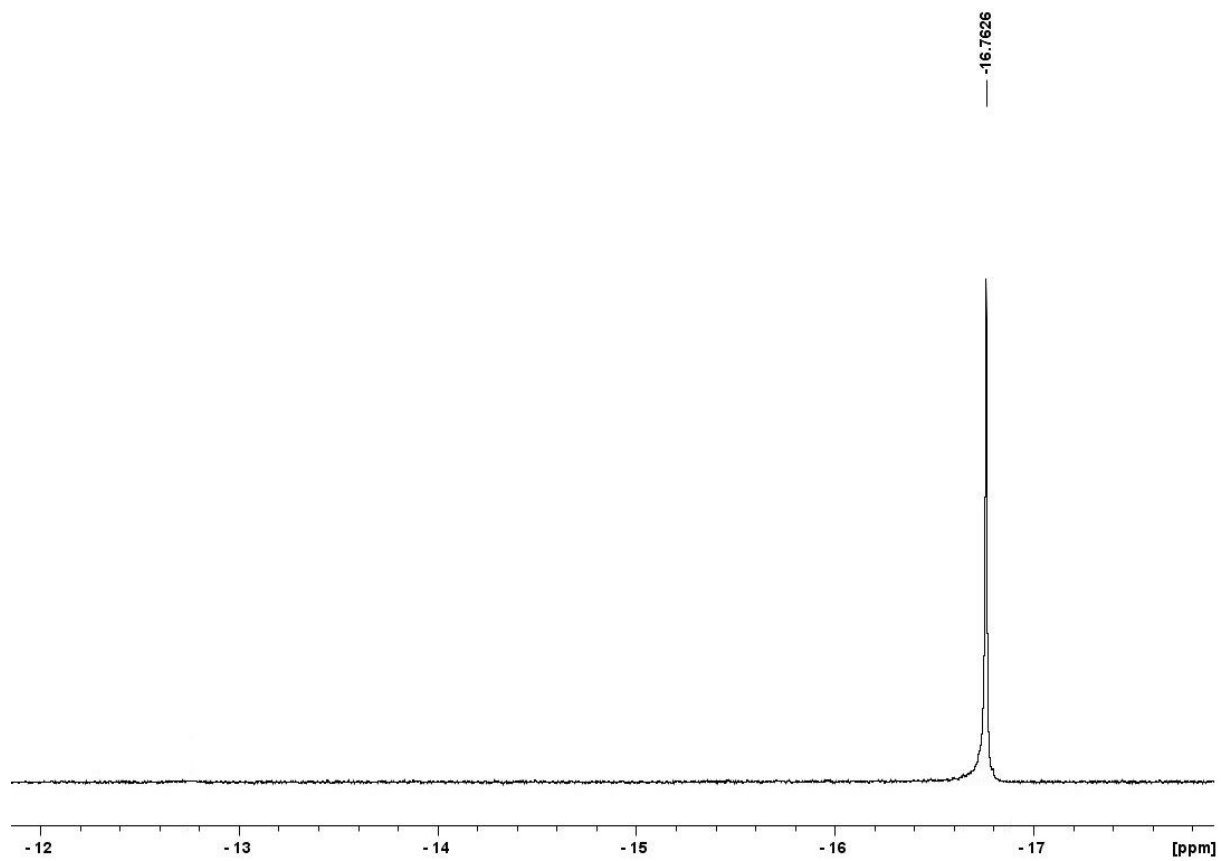

**Figure S12.** Hydride region of the  $^1\text{H}$  NMR spectrum of  $[\text{HOs}_3(\text{CO})_9(\mu_3\text{-C}_5\text{H}_4\text{NC}=\text{CHCO}_2)]$  (**3**) in  $\text{CDCl}_3$  at 400 MHz.

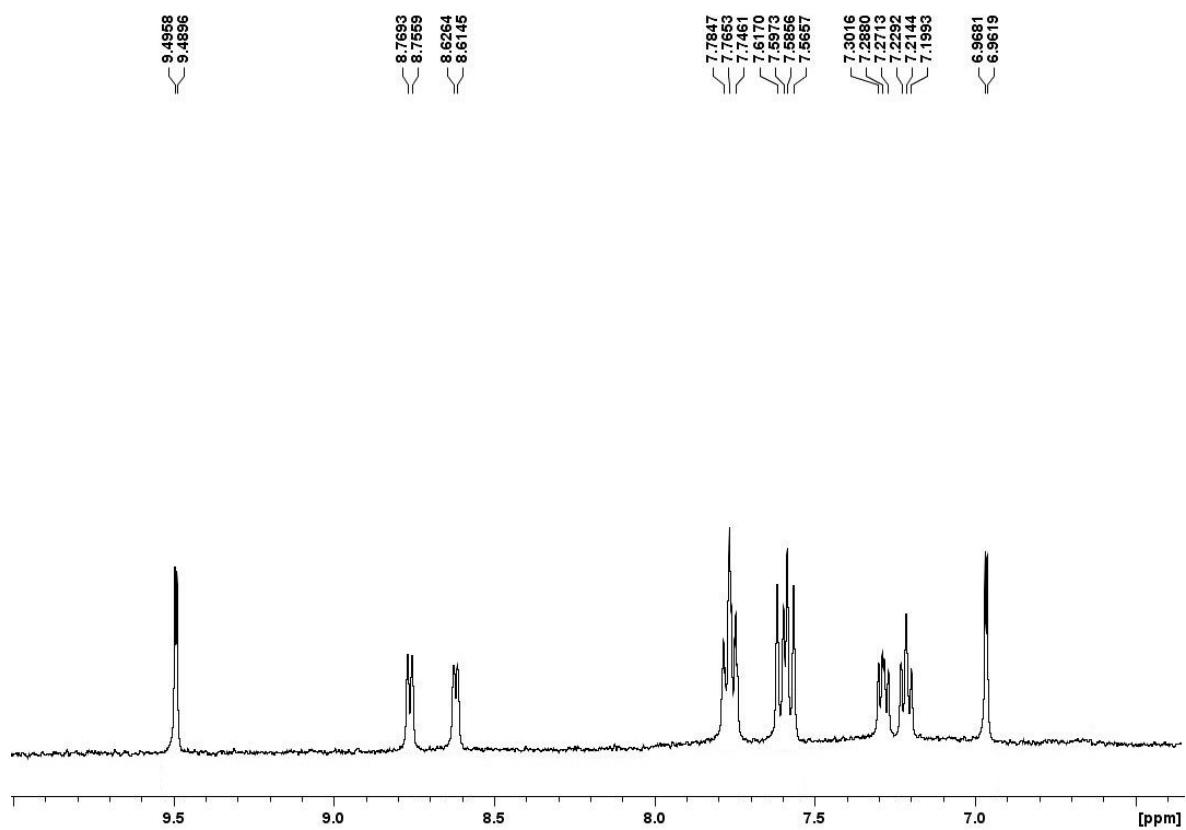

**Figure S13.**  $^1\text{H}$  NMR spectrum of  $[\text{Ru}_3(\text{CO})_7(\mu\text{-CO})\{\mu_3\text{-C}_5\text{H}_4\text{NC}=\text{CHC}(\text{C}_5\text{H}_4\text{N})=\text{CH}\}]$  (**5**) in  $\text{CD}_2\text{Cl}_2$  at 400 MHz.

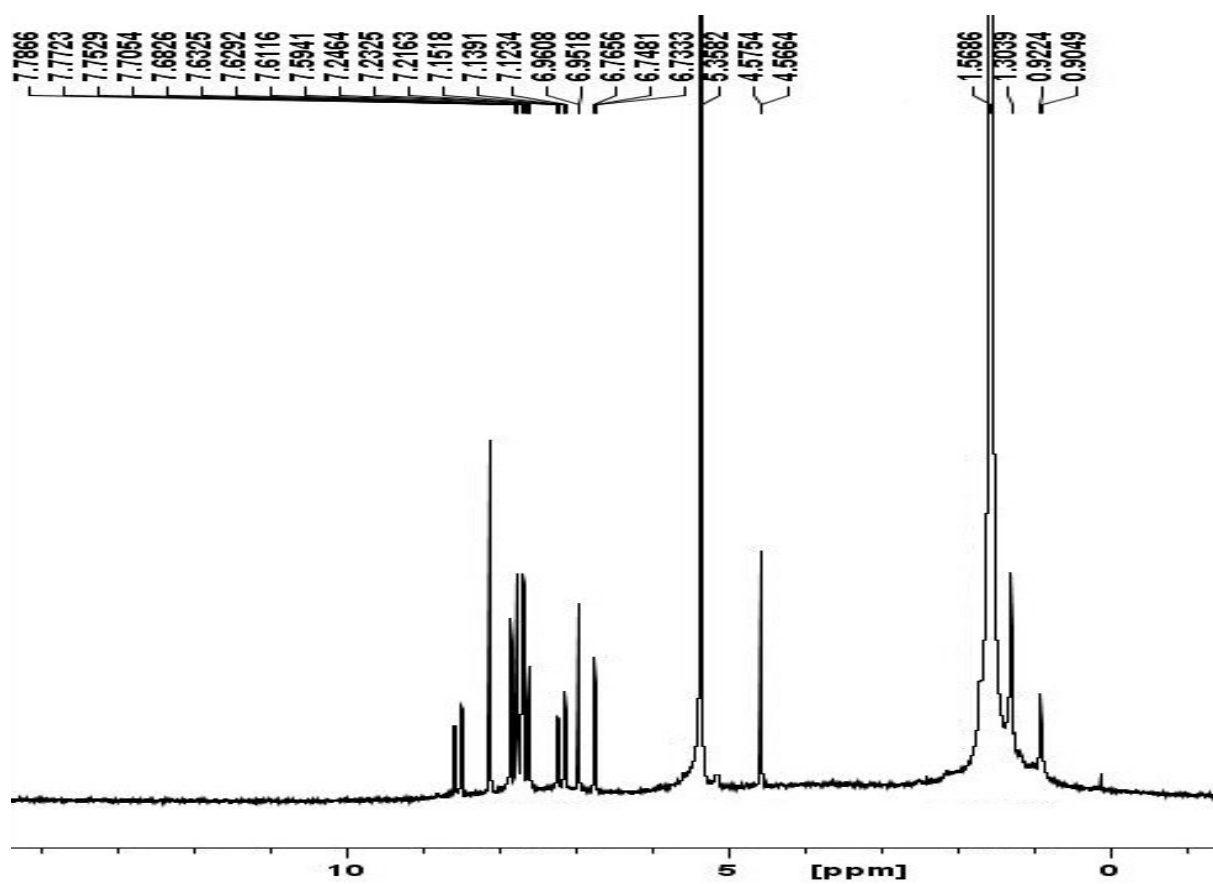

**Figure S14.** <sup>1</sup>H NMR spectrum of [Ru<sub>3</sub>(CO)<sub>7</sub>(μ-CO){μ<sub>3</sub>-C<sub>5</sub>H<sub>4</sub>NCCHC(C<sub>5</sub>H<sub>4</sub>N)CHCHC(C<sub>5</sub>H<sub>4</sub>N)}] (**6**) in CD<sub>2</sub>Cl<sub>2</sub> at 400 MHz. The spectrum also shows residual proton signal of CD<sub>2</sub>Cl<sub>2</sub> (at δ 5.35) and H<sub>2</sub>O (at δ 1.56). The compound was recrystallized from *n*-hexane/CH<sub>2</sub>Cl<sub>2</sub> for purification during workup whose signals are also present in the spectrum (*n*-hexane at δ 1.30 and 0.92).

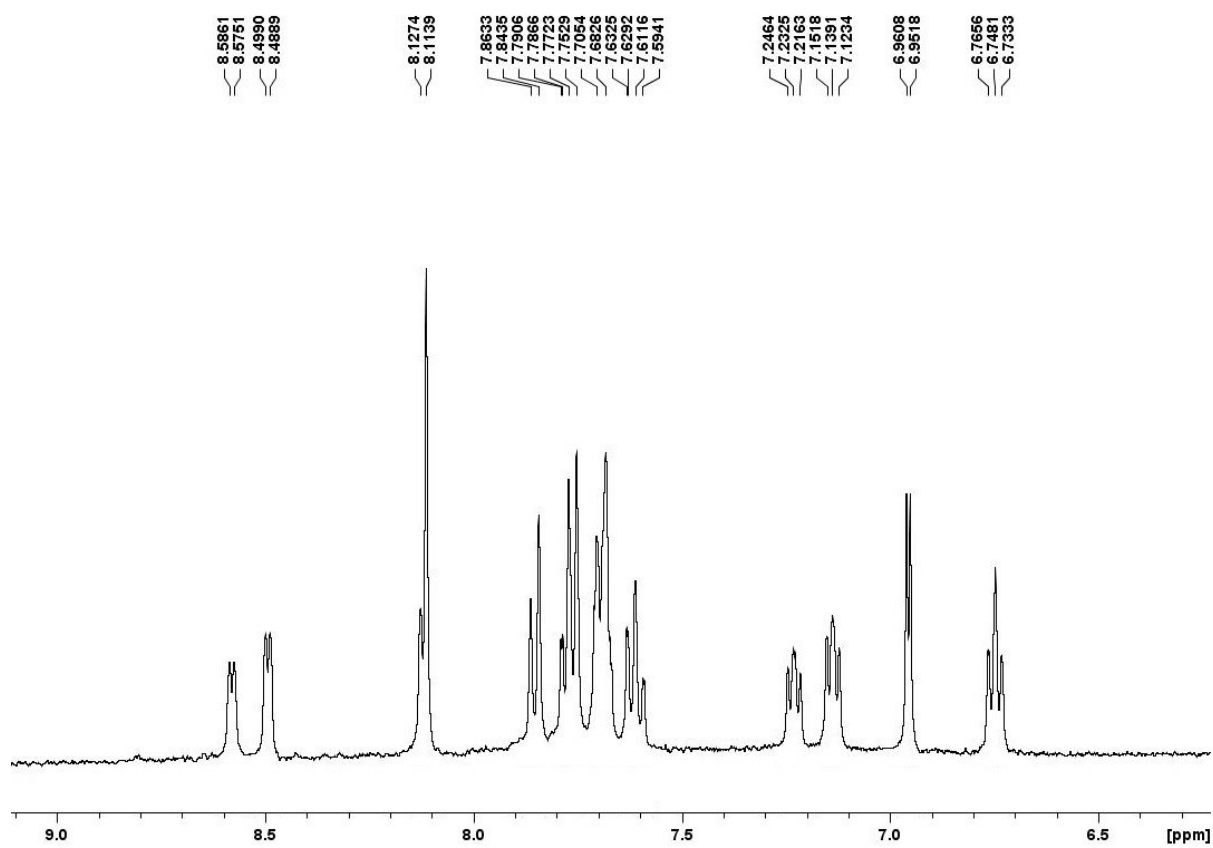

**Figure S15.** Aromatic region of the  $^1\text{H}$  NMR spectrum of  $[\text{Ru}_3(\text{CO})_7(\mu\text{-CO})\{\mu_3\text{-C}_5\text{H}_4\text{NCCHC}(\text{C}_5\text{H}_4\text{N})\text{CHCHC}(\text{C}_5\text{H}_4\text{N})\}]$  (**6**) in  $\text{CD}_2\text{Cl}_2$  at 400 MHz.



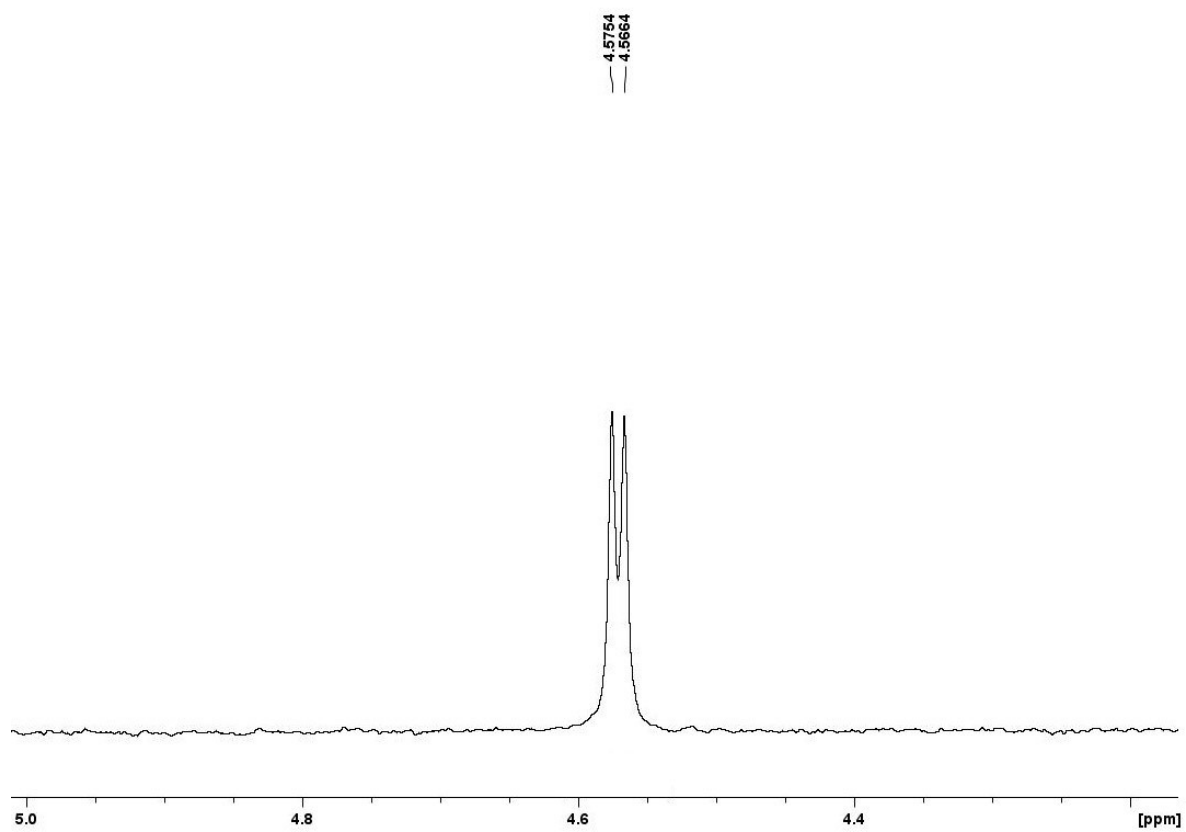

**Figure S16.** Aliphatic region of the  $^1\text{H}$  NMR spectrum of  $[\text{Ru}_3(\text{CO})_7(\mu\text{-CO})\{\mu_3\text{-C}_5\text{H}_4\text{NCCHC}(\text{C}_5\text{H}_4\text{N})\text{CHCHC}(\text{C}_5\text{H}_4\text{N})\}]$  (**6**) in  $\text{CD}_2\text{Cl}_2$  at 400 MHz.
